# Supplementary material
Source: PubMed Central journal article supplement (PMC3718164)
Supplement: 1310704110_pnas.201310704SI.pdf [file 1310704110_pnas.201310704SI.pdf]

# Supporting Information

Lonfat et al. 10.1073/pnas.1310704110

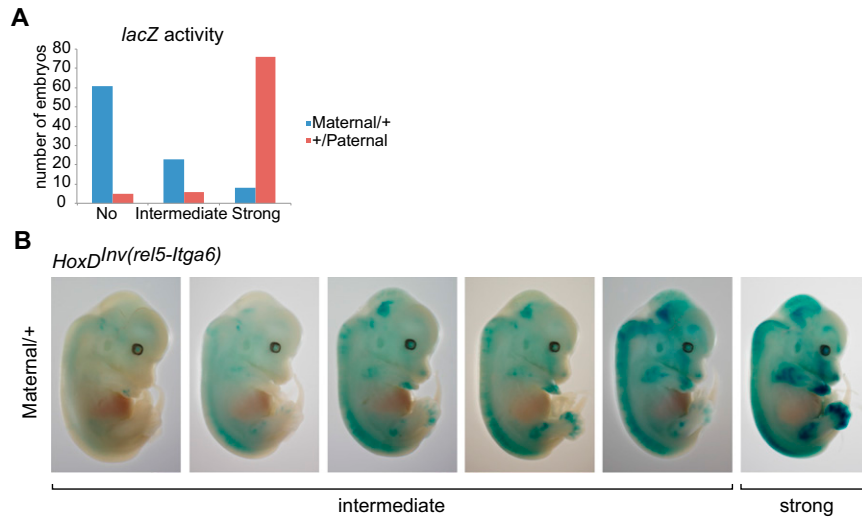

**Fig. S1.** Variagation of transgene silencing on the maternal chromosome. (A) Summary of the strength of *lacZ* staining in heterozygous embryos carrying the transgene after either maternal or paternal transmission. (B) A substantial percentage of Maternal/+ embryos carrying the *HoxD*<sup>Inv(rel5-Itga6)</sup> inversion escapes the repression of the reporter *lacZ*. These escapers show staining with variable extents (qualified as intermediate) ranging from almost no activity to no repression at all (strong), which is similar to +/Paternal animals expression. They are characterized by distinct, heterogenous, and mostly clonal patterns of expression, with patches and stripes of *lacZ* activity.

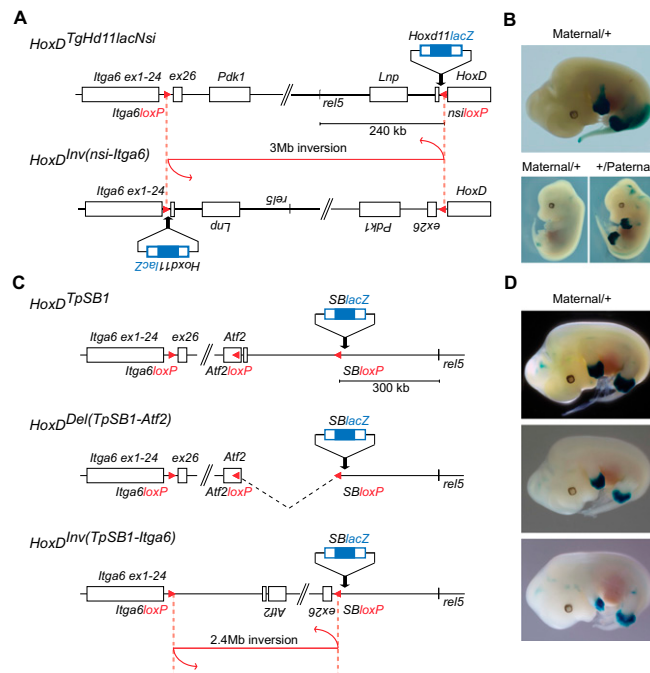

**Fig. S2.** The imprinting is *Itga6* locus-specific. (A) Scheme of the *HoxD*<sup>TgHd11lacNsi</sup> allele carrying an *Hoxd11lacZ* transgene (blue) along with a *loxP* site (red). Using another *loxP* site on the same chromosome within the *Itga6* locus (1), we induced the *HoxD*<sup>Inv(TgHd11lacNsi-Itga6)</sup> inversion, which repositioned the *Hoxd11lacZ* transgene into *Itga6* (on the bottom) at the same position where the *Hoxd9lacZ* transgene is located in the *HoxD*<sup>Inv(rel5-Itga6)</sup> allele. (B) Whole-mount staining of  $\beta$ -gal reporter activity. Before inversion, the transgene inherited from either (Upper) the mother or the father (not shown for clarity) displays the exact same strong expression, similar to the endogenous *Hoxd11*. After inversion, a strong maternal imprinting of the *Hoxd11lacZ* transgene is scored, with no staining compared with the paternal transmission of the transgene. (C) Different insertion sites within the *HoxD* landscape show no imprinting effect on a reporter transgene. *HoxD*<sup>TpSB1</sup> is the insertion of a Sleeping Beauty (SB) transposon 300 kb upstream of *rel5*. SB contains a reporter *lacZ* associated with a minimal promoter of the  $\beta$ -Globin gene (blue) and a *loxP* site cloned upstream (red) (2); *lacZ* staining of the transgene in embryos heterozygous for SB shows no allelic difference when transmitted through either (D) a female or a male. *HoxD*<sup>Del(TpSB1-Atf2)</sup> is a deletion between a *loxP* site in the *Atf2* gene (red) (3) and the SB *loxP* site. The relocation of the SB transgene 290 kb closer to the *Itga6* locus shows no parental influence on the expression of the *lacZ*. Maternal/+ and +/Paternal embryos staining are similar. The *HoxD*<sup>Inv(TpSB1-Itga6)</sup> inversion addresses the effect of *Itga6* exon 26 and its telomeric landscape on *lacZ* reporter expression. Using a *loxP* in the *Itga6* locus and the SB *loxP* (upstream the *lacZ*), a *cre* recombinase-mediated inversion relocated the last exon of *Itga6* near the reporter gene still located at the TpSB1 position. Neither the exon 26 nor the *Itga6* telomeric landscape induced imprinting on SB transgenes. Both parental inherited transgenes showed the same *lacZ* expression (Maternal/+ embryo for the inversion shown in D).

1. Gimond C, et al. (1998) Cre-loxP-mediated inactivation of the alpha6A integrin splice variant in vivo: Evidence for a specific functional role of alpha6A in lymphocyte migration but not in heart development. *J Cell Biol* 143(1):253–266.
2. Ruf S, et al. (2011) Large-scale analysis of the regulatory architecture of the mouse genome with a transposon-associated sensor. *Nat Genet* 43(4):379–386.
3. Shah M, et al. (2010) A role for ATF2 in regulating MITF and melanoma development. *PLoS Genet* 6(12):e1001258.

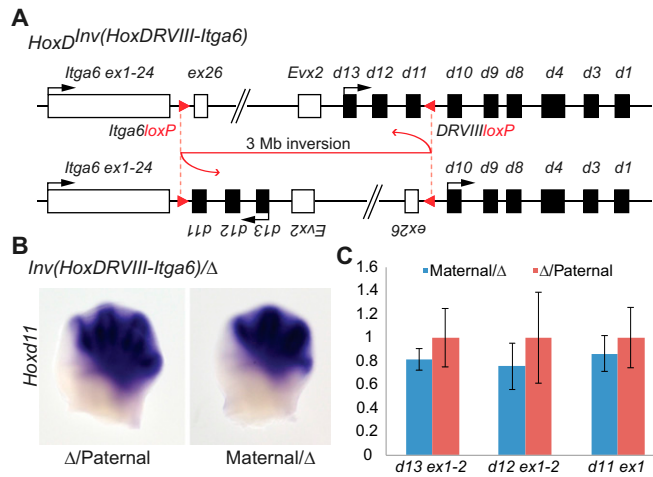

**Fig. S3.** *lacZ* sequence-dependent imprinting specific to the *Itga6* locus. (A) Scheme of the  $HoxD^{Inv(HoxDRVIII-Itga6)}$  allele, which is an inversion between a *loxP* site (red) located between *Hoxd11* and *Hoxd10* and a *loxP* site within the *Itga6* gene [red; same as for the  $HoxD^{Inv(reI5-Itga6)}$  allele]. *Hoxd11*, *Hoxd12*, and *Hoxd13* are now relocated in the *Itga6* locus, and the position of *Hoxd11* corresponds to the location of the imprinted *Hoxd9lacZ* transgene in the  $HoxD^{Inv(reI5-Itga6)}$  allele. (B and C) Mice heterozygous for the  $HoxD^{Inv(HoxDRVIII-Itga6)}$  inversion were crossed with animals carrying a deletion from *Hoxd8* to *Hoxd13* [ $HoxD^{DelRXII(13-8)}$ , depicted by the  $\Delta$ ] to ensure a correct allelic comparison of *Hoxd11* expression. (B) *Hoxd11* expression in E12.5 digits after inversion with the allele inherited from either the father or the mother. Whole-mount in situ hybridizations of *Hoxd11* show no parent-specific transmission effect. (C) Quantitative RT-PCRs (RT-qPCRs) on digits mRNA confirms that all relocated genes on both parental alleles ( $n = 4$ ) have similar expression levels.

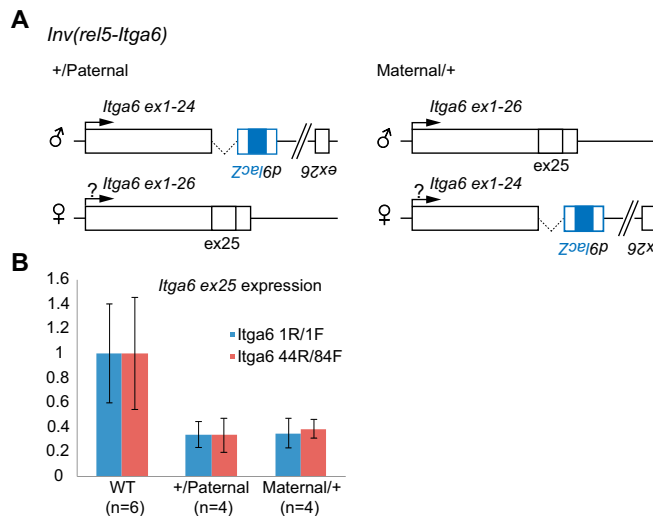

**Fig. S4.** The *Itga6* locus is not imprinted. (A) Scheme of the *Itga6* locus in heterozygous  $HoxD^{Inv(reI5-Itga6)}$  animals. The *loxP* site within *Itga6* comes with a deletion of exon 25 (1). (B) Specific RT-qPCR primers designed for the *Itga6* exon 25 were used to compare expression levels of *Itga6* in either the Maternal/+ or the +Paternal  $HoxD^{Inv(reI5-Itga6)}$  configurations. No significant parental bias is scored, at least for the expression of *Itga6* exon 25.

1. Gimond C, et al. (1998) Cre-*loxP*-mediated inactivation of the alpha6A integrin splice variant in vivo: Evidence for a specific functional role of alpha6A in lymphocyte migration but not in heart development. *J Cell Biol* 143(1):253-266.

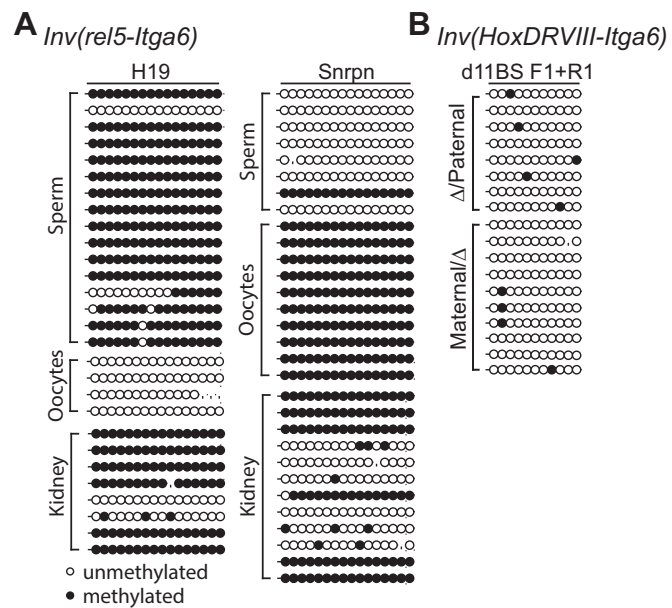

**Fig. 55.** Controls for DNA methylation. (A) The germ cells samples used in the study display the expected control patterns of methylation for *H19* (methylated in sperm) and *Snrpn* (methylated in oocytes). (B) Bisulfite sequencing analysis of *Hoxd11* in the *HoxD<sup>Inv(HoxDRVIII-Itga6)</sup>* allele. No differential methylation was found when *Hoxd11* was positioned within *Itga6*. Primer sequences are in Table S1.

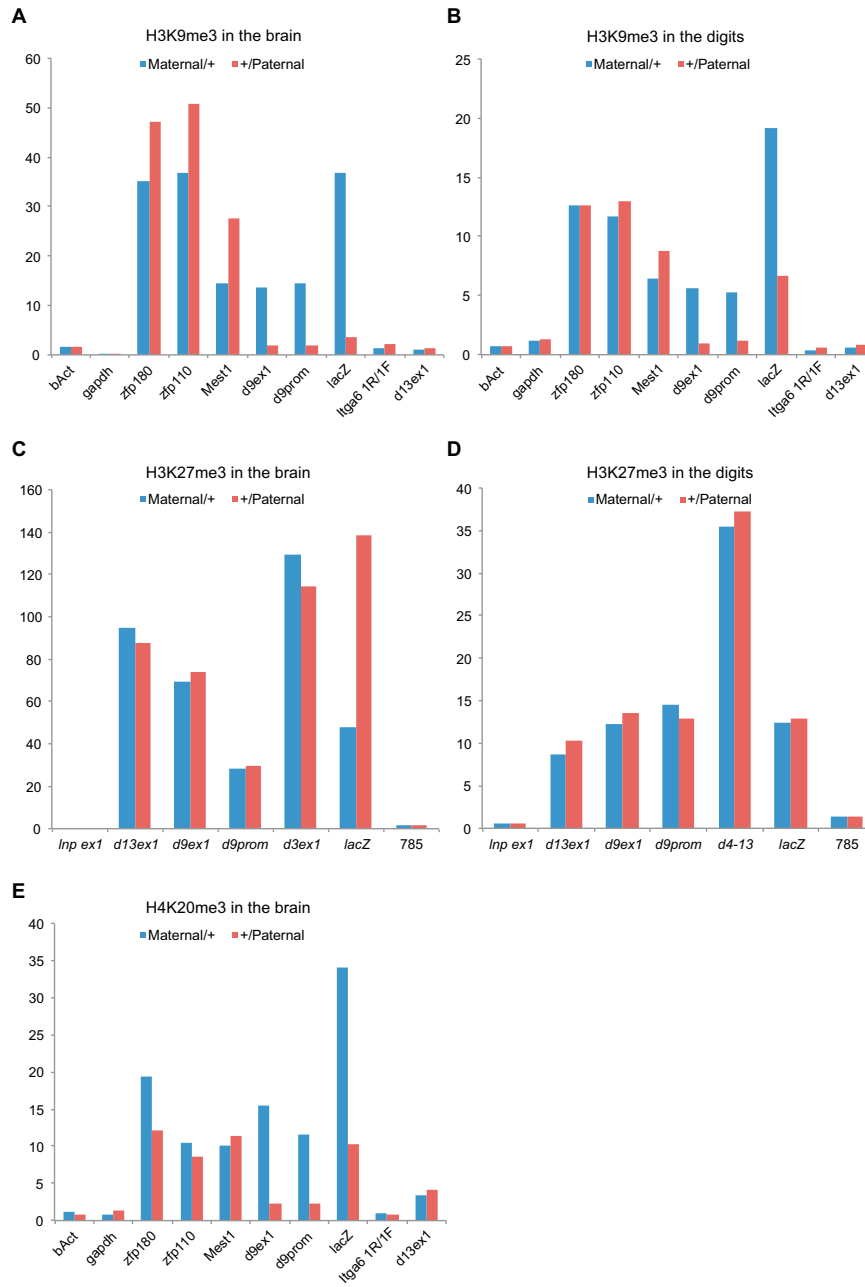

**Fig. S6.** Repressive histone methylation marks cover the silenced transgene. ChIP followed by qPCR on E12.5 forebrain or presumptive digits from *HoxD<sup>Inv(reI5-Itga6)</sup>* embryos using (A and B) H3K9me3, (C and D) H3K27me3, and (E) H4K20me3 antibodies. Primer sequences are given in Table S1.

**Table S1. List of primers used in the study**

| Gene                 | Sequence                           |
|----------------------|------------------------------------|
| RT-qPCR              |                                    |
| Itga6 1F             | AAG ATC ATT ACG ATG CCA CCT        |
| Itga6 1R             | TGC ATC GGA AGT AAG CCT CT         |
| Itga6 44F            | ATG CCA CCT ATC ACA AGG CTG        |
| Itga6 84R            | AGA CGG CTG AGT ATG GAT CTC AG     |
| lacZ F               | ATC AGG ATA TGT GGC GGA TGA        |
| lacZ R               | TGA TTT GTG TAG TCG GTT TAT GCA    |
| Dlx1 ex1-2 F         | GGC TAC CCC TAC GTC AAC TC         |
| Dlx1 ex1-2 R         | TTT TTC CCT TTG CCG TTA AAG C      |
| Dlx2 ex1-2 F         | AAC CAC GCA CCA TCT ACT C          |
| Dlx2 ex1-2 R         | TGA CCT GAG TTT GGG TGA G          |
| Dlx2 ex2-3 F         | ACA ATG TCT CCT ACT CCG C          |
| Dlx2 ex2-3 R         | TCA AGG TCT TCC TTG TCC G          |
| ZFP180-3'-F          | CCG TAC AGG TGC AAT CTG TG         |
| ZFP180-3'-R          | GTT TGT AGC TCT GGC GGA AC         |
| ZFP110-3'-F          | AAC GAC CGC TCA GCC ATC TC         |
| ZFP110-3'-R          | GCC TGG TAA GGT GGG AAC TC         |
| $\beta$ -Actin F     | AGC CAA CTT TAC GCC TAG CGT        |
| $\beta$ -Actin R     | TCT CAA GAT GGA CCT AAT ACG GC     |
| Gapdh F              | AGG TCG GTG TGA ACG GAT TTG        |
| Gapdh R              | TGT AGA CCA TGT AGT TGA GGT CA     |
| Bisulfite sequencing |                                    |
| hoxd9lacBS F         | AAG GGG GAT GTG TTG TAA GG         |
| hoxd9lacBS R         | TCA CAA CAA CCC CCA ATT TA         |
| d11BS F1             | GGT TTG TAT TTT TGT TTT TGG TGT TA |
| d11BS R1             | ATA TAA AAT TCC CAC CCC CAC        |
| 4C                   |                                    |
| lacZD2 F             | GTC GTT TGC CGT CTG AAT TT         |
| lacZD2 R             | GAG GGG ACG ACG ACA GTA TC         |

*HoxD* primers for RT-qPCR were described in ref. 1.

1. Montavon T, Le Garrec J-F, Kerszberg M, Duboule D (2008) Modeling Hox gene regulation in digits: Reverse collinearity and the molecular origin of thumbness. *Genes Dev* 22(3): 346–359.
